# Supplementary material
Source: PubMed Central journal article supplement (PMC9253115)
Supplement: 41401_2021_805_MOESM1_ESM.pdf [file 41401_2021_805_MOESM1_ESM.pdf]

This document certifies that the manuscript

## **Dapagliflozin attenuates myocardial remodeling induced by pressure overload by activating SIRT1 to inhibit endoplasmic reticulum stress**

prepared by the authors

**任芳芳**

was edited for proper English language, grammar, punctuation, spelling, and overall style by one or more of the highly qualified native English speaking editors at AJE.

This certificate was issued on **October 19, 2021** and may be verified on the [AJE website](#) using the verification code **9FBA-7481-7EF9-5FF4-2F6P**.

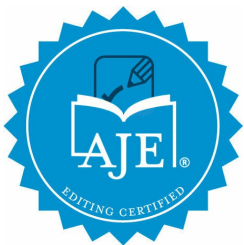

Neither the research content nor the authors' intentions were altered in any way during the editing process. Documents receiving this certification should be English-ready for publication; however, the author has the ability to accept or reject our suggestions and changes. To verify the final AJE edited version, please visit our verification page at [aje.com/certificate](#). If you have any questions or concerns about this edited document, please contact AJE at [support@aje.com](mailto:support@aje.com).
